# Supplementary material
Source: publisher site journal article supplement (https://www.dovepress.com/article/336344)

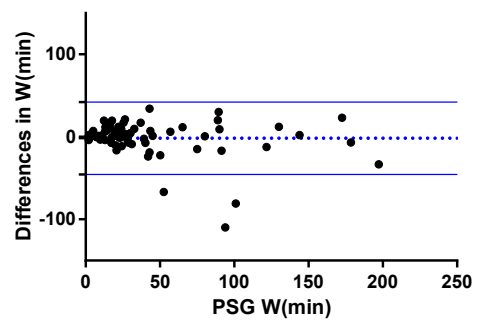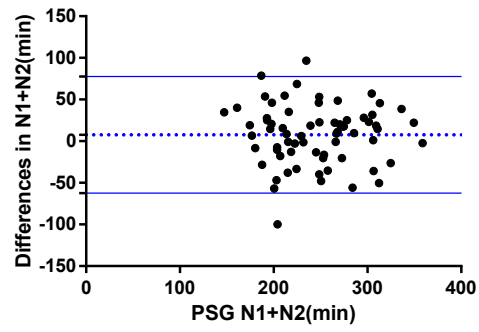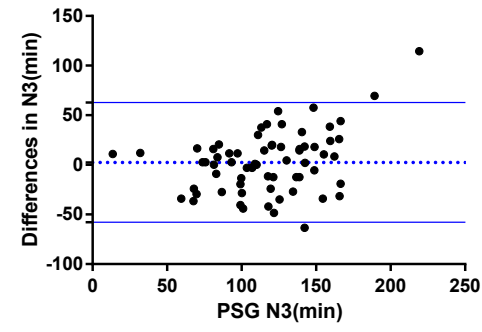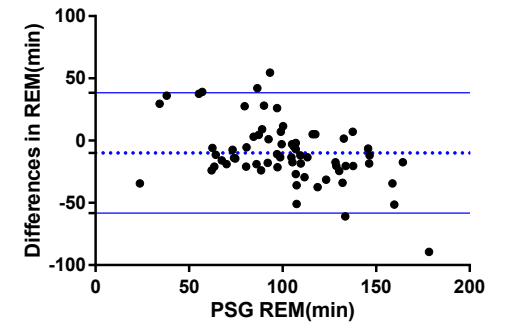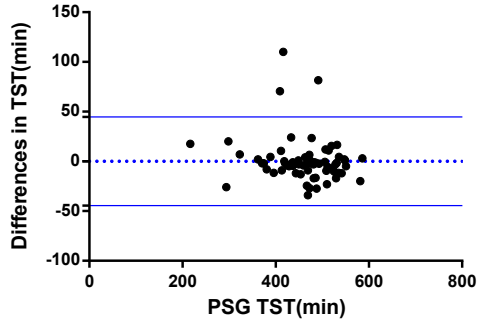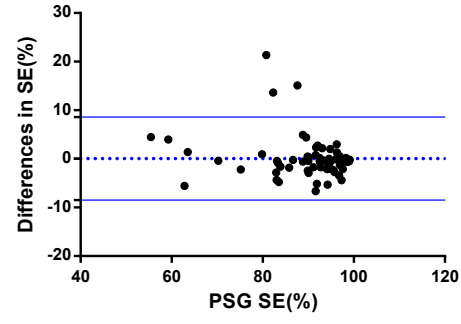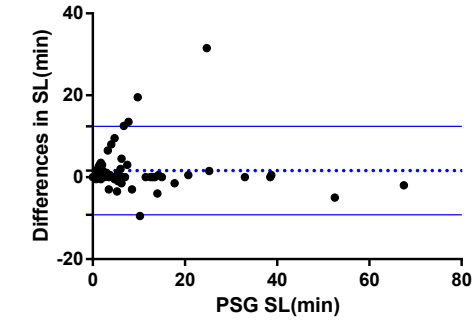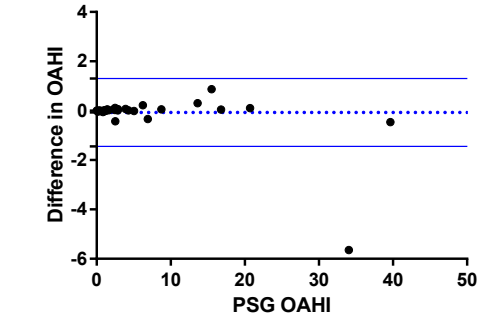

Supplement: Supplementary file 1 [file 08_Nov_2021_336344-FigureS1-updated.pdf › 08_Nov_2021_336344-FigureS1-updated.pdf]
